# Supplementary material
Source: publisher figshare collection journal article supplement (https://gsajournals.figshare.com/ndownloader/files/17598512)
Supplement: Supplementary file 1 [file 17598512]

## Sheet: Strains
Strain	Genotype
GS6392	lin-12(n302); nre-1(hd20) lin-15b(hd126)
GS7067	lin-12(n302); nre-1(hd20) lin-15b(hd126)
GS8538	nre-1(hd20) lin-15b(hd126)
GS8405	arTi43; arTi24; nre-1(hd20) lin-15b(hd126)
GS1081	sel-10 (ar41) him-5 (e1490)
GS8400	lin-12(n302)/qC1; sel-10 (ar41) him-5 (e1490)
VC3442	cdk-11.1(gk1202)/mIn1[mIs14]
GS8304	cdk-11.1(gk1202)/mIn1[mIs14]; lin-12(n302)
VC398	kin-20(ok505)
GS8308	lin-12(n302); kin-20(ok505)
FX01238	cdk-8(tm1238)
GS8416	cdk-8(tm1238); lin-12(n302)
FX00364	sel-15(tm0364)
GS7096	sel-15(tm0364) lin-12(n302)
FX04036	efk-1(tm4036)
GS7095	efk-1(tm4036) lin-12(n302)
NJ834	mig-15(rh236)
GS8306	lin-12(n302); mig-15(rh236)
GS6693	hpo-11(tm4320)/hT2[qIs48]
GS7097	hpo-11(tm4320)/hT2[qIs48]; lin-12(n302)/hT2
GS8307	lin-12(n302); par-1(zu310ts)
